# Supplementary material for: The role of SWI/SNF chromatin remodelers in the repair of DNA double strand breaks and cancer therapy
Source: Frontiers journal article supplement (doi:10.3389/fcell.2022.1071786), 2022-12-20
Supplement: Data_Sheet_1.PDF [file Data_Sheet_1.PDF]

**Supplementary Table 1: SWI/SNF subunits mutated in cancer.** Data obtained from the TCGA through cBioportal showing the frequency of mutations in SWI/SNF subunits across different cancer types. The asterisk (\*) denotes mutation data when the majority of mutations are amplifications, otherwise the majority of alterations are missense mutations or deletions. The TCGA data set contains 10,967 samples. Only the top four cancer types are shown.

| Complex           | Subunit type | Subunit (Gene name) | Cancer type                                                                                                                       |
|-------------------|--------------|---------------------|-----------------------------------------------------------------------------------------------------------------------------------|
| cBAF, PBAF, ncBAF | Catalytic    | BRG1 (SMARCA4)      | Endometrial Cancer (14.33%)<br>Melanoma (10.36%)<br>Ovarian epithelial tumor (9.76%)*<br>Esophagogastric cancer (8.52%)           |
| cBAF, PBAF, ncBAF | Catalytic    | BRM (SMARCA2)       | Endometrial cancer (11.09%)<br>Bladder cancer (9.49%)<br>Esophagogastric cancer (9.32%)<br>Melanoma (8.78%)                       |
| cBAF, PBAF        | Core         | BAF47 (SMARCB1)     | Endometrial cancer (4.27%)<br>Bladder cancer (3.65%)<br>Esophagogastric cancer (3.38%)<br>Colorectal cancer (2.36%)               |
| cBAF, PBAF, ncBAF | Core         | BAF155 (SMARCC1)    | Endometrial cancer (7%)<br>Mature B-cell neoplasms (6.25%)*<br>Melanoma (6.08%)<br>Bladder cancer (3.65%)                         |
| cBAF, PBAF        | Core         | BAF170 (SMARCC2)    | Endometrial cancer (9.9%)<br>Melanoma (7.66%)<br>Bladder cancer (6.08%)<br>Esophagogastric cancer (5.14%)                         |
| cBAF, PBAF        | Core         | BAF57 (SMARCE1)     | Esophagogastric cancer (9.32%)*<br>Adrenocortical carcinoma (4.4%)<br>Endometrial cancer (4.27%)<br>Breast cancer (4.24%)*        |
| cBAF, PBAF, ncBAF | Core         | BAF60A (SMARCD1)    | Adrenocortical carcinoma (4.4%)*<br>Mature B-cell neoplasms (4.17%)*<br>Endometrial cancer (4.1%)<br>Melanoma (2.93%)             |
| cBAF, PBAF, ncBAF | Core         | BAF60B (SMARCD2)    | Breast cancer (6.64%)*<br>Pleural mesothelioma (5.75%)*<br>Endometrial cancer (4.78%)<br>Esophagogastric cancer (3.54%)           |
| cBAF, PBAF, ncBAF | Core         | BAF60C (SMARCD3)    | Ovarian epithelial tumor (8.22%)*<br>Endometrial cancer (4.78%)<br>Adrenocortical carcinoma (4.4%)<br>Melanoma (4.05%)            |
| cBAF, PBAF, ncBAF | Accessory    | B actin (ACTB)      | Mature B-cell neoplasms (8.33%)<br>Bladder cancer (8.03%)<br>Adrenocortical carcinoma (5.49%)*<br>Esophagogastric cancer (5.31%)* |

|                         |           |                     |                                                                                                                                                       |
|-------------------------|-----------|---------------------|-------------------------------------------------------------------------------------------------------------------------------------------------------|
| cBAF,<br>PBAF,<br>ncBAF | Accessory | BAF53A<br>(ACTL6A)  | Ovarian epithelial tumor (19.52%)*<br>Non-small cell lung cancer (19.28%)*<br>Head and neck cancer (15.87%)*<br>Cervical cancer (15.49%)*             |
| cBAF,<br>PBAF,<br>ncBAF | Accessory | BAF53B<br>(ACTL6B)  | Esophagogastric cancer (6.75%)*<br>Melanoma (5.63%)<br>Head and neck cancer (4.97%)*<br>Endometrial cancer (4.78%)                                    |
| cBAF,<br>ncBAF          | Accessory | SS18                | Pancreatic cancer (5.98%)*<br>Sarcoma (5.1%)*<br>Ovarian epithelial tumor (4.45%)*<br>Endometrial cancer (4.27%)                                      |
| cBAF,<br>ncBAF          | Accessory | CREST<br>(SS18L1)   | Colorectal cancer (8.08%)*<br>Ovarian epithelial tumor (6.68%)*<br>Sarcomas (5.49%)*<br>Endometrial cancer (5.12%)*                                   |
| cBAF,<br>PBAF,<br>ncBAF | Accessory | BCL7A               | Mature B-cell neoplasms (8.33%)<br>Endometrial cancer (2.39%)<br>Sarcoma (2.35%)*                                                                     |
| cBAF,<br>PBAF,<br>ncBAF | Accessory | BCL7B               | Non-seminomatous germ cell tumor (3.49%)*<br>Adrenocortical carcinoma (3.3%)*<br>Ovarian epithelial tumor (2.57%)*<br>Esophagogastric cancer (2.25%)* |
| cBAF,<br>PBAF,<br>ncBAF | Accessory | BCL7C               | Endometrial cancer (5.12%)*<br>Breast cancer (4.24%)*<br>Melanoma (2.7%)<br>Esophagogastric cancer (2.25%)                                            |
| cBAF                    | Accessory | BAF250A<br>(ARID1A) | Endometrial cancers (40.78%)<br>Bladder cancer (27.25%)<br>Esophagogastric cancer (21.7%)<br>Cholangiocarcinomas (13.89%)                             |
| cBAF                    | Accessory | BAF250B<br>(ARID1B) | Endometrial cancer (9.39%)<br>Melanoma (9.01%)<br>Cholangiocarcinomas (8.33%)<br>Bladder cancer (7.79%)                                               |
| cBAF                    | Accessory | BAF45B<br>(DPF1)    | Ovarian epithelial tumor (8.05%)*<br>Endometrial cancer (5.97%)*<br>Pancreatic cancer (5.43%)*<br>Bladder cancer (5.11%)*                             |
| cBAF                    | Accessory | BAF45C<br>(DPF3)    | Endometrial cancer (3.24%)<br>Melanoma (2.93%)<br>Esophagogastric cancer (2.89%)<br>Cholangiocarcinomas (2.78%)                                       |
| cBAF                    | Accessory | BAF45D<br>(DPF2)    | Endometrial cancer (4.95%)<br>Head and neck cancer (4.78%)*<br>Melanoma (4.73%)<br>Bladder cancer (4.62%)*                                            |
| PBAF                    | Accessory | BAF200<br>(ARID2)   | Melanoma (17.57%)<br>Endometrial cancer (11.6%)<br>Bladder cancer (9%)                                                                                |

|       |           |                   |                                                                                                                                              |
|-------|-----------|-------------------|----------------------------------------------------------------------------------------------------------------------------------------------|
|       |           |                   | Esophagogastric cancer (7.56%)                                                                                                               |
| PBAF  | Accessory | BAF180 (PBRM1)    | Renal clear cell carcinoma (30.92%)<br>Cholangiocarcinomas (19.44%)<br>Endometrial Cancer (10.92%)<br>Melanoma (7.88%)                       |
| PBAF  | Accessory | BRD7              | Endometrial Cancer (5.63%)<br>Melanoma (4.95%)<br>Bladder cancer (3.65%)<br>Hepatobiliary cancer (2.96%)                                     |
| PBAF  | Accessory | BAF45A (PHF10)    | Ocular melanoma (7.5%)<br>Cholangiocarcinomas (5.56%)<br>Endometrial cancer (4.78%)<br>Hepatobiliary cancer (3.49%)                          |
| ncBAF | Accessory | BRD9              | Non-Small Cell lung cancer (13.87%)*<br>Adrenocortical carcinomas (13.19%)*<br>Bladder cancer (10.71%)*<br>Ovarian epithelial tumor (9.25%)* |
| ncBAF | Accessory | GLTSCR1 (BICRA)   | Mature B cell neoplasms (6.25%)<br>Endometrial cancer (5.63%)<br>Cholangiocarcinomas (2.78%)<br>Colorectal cancer (2.69%)                    |
| ncBAF | Accessory | GLTSCR1L (BICRAL) | Esophagogastric cancer (8.84%)*<br>Melanoma (7.66%)<br>Mature B-cell neoplasm (6.25%)*<br>Endometrial cancer (5.63%)                         |
